# Supplementary material for: Ghrelin and Ghrelin/Total Cholesterol Ratio as Independent Predictors for Coronary Artery Disease: A Systematic Review and Meta-Analysis
Source: HighWire-hosted journal article supplement (doi:10.1136/jim-2021-002100), 2022-01-18

**Table 1.** Main characteristics of the included studies

| Author         | Year | Total sample size | Study design | Country | Mean age (case/control)    | Cases         | Controls                     | Diabetes/Met S comorbidities | Body fluid | Quality scores |
|----------------|------|-------------------|--------------|---------|----------------------------|---------------|------------------------------|------------------------------|------------|----------------|
| Afify et al.   | 2009 | 80                | Case-control | Egypt   | 31.3 ± 15.2, 32.4 ± 18.8   | CHD           | Healthy infants and children | Without                      | Serum      | Low            |
| Chen et al.    | 2014 | 200               | Cohort       | China   | 67.1 ± 19.5, 69.6 ± 23.8   | CHF           | Healthy subjects             | Without                      | Plasma     | High           |
| GHAZI#a et al. | 2019 | 75                | Case-control | Iraq    | 47.79 ± 8.34, 57.68 ± 7.01 | MI with DM    | Healthy subjects             | With                         | Serum      | High           |
| GHAZI#b et al. | 2019 | 75                | Case-control | Iraq    | 47.79 ± 8.34, 54.48 ± 9.41 | MI without DM | Healthy subjects             | Without                      | Serum      | High           |
| Hamed et al.   | 2012 | 84                | Case-control | Egypt   | 20.3 ± 0.21, 24.3 ± 0.41   | AMI           | Healthy subjects             | With                         | Serum      | High           |
| Kandil et al.  | 2009 | 58                | Case-control | Egypt   | 15.67 ± 7.81, 13.23 ± 8.38 | CHD           | Healthy control children     | Without                      | Serum      | Low            |
| Kilic et al.   | 2017 | 61                | Case-control | Turkey  | 49.5 ± 12.2, 50.5 ± 11.0   | IHD           | Healthy subjects             | Without                      | Serum      | High           |
| Lund et al.    | 2009 | 19                | Cross-       | New     | 42 ± 14,                   | HF            | Healthy                      | With                         | Plasma     | High           |

|                     |      |    |              |        |                         |      |                                                      |         |        |      |
|---------------------|------|----|--------------|--------|-------------------------|------|------------------------------------------------------|---------|--------|------|
|                     |      |    | sectional    | York   | 52 ± 16                 |      | subjects                                             |         | a      |      |
| Matsumoto #a et al. | 2013 | 15 | Case-control | Japan  | 66 ± 5, 66 ± 6          | SAP  | Control without significant coronary artery stenosis | With    | Serum  | High |
| Matsumoto #b et al. | 2013 | 14 | Case-control | Japan  | 66 ± 5, 64 ± 5          | UAP  | Control without significant coronary artery stenosis | With    | Serum  | High |
| Matsumoto #c et al. | 2013 | 18 | Case-control | Japan  | 66 ± 6, 67 ± 10         | AMI  | Control without significant coronary artery stenosis | With    | Serum  | High |
| Nagaya et al.       | 2001 | 86 | Case-control | Japan  | 57 + 13.416,            | CHF  | Healthy subjects                                     | Without | Plasma | High |
| Özcan et al.        | 2015 | 83 | Case-control | Turkey | 67 ± 10, 67.38 ± 7.57   | ADHF | Healthy subjects                                     | With    | Serum  | High |
| Shahramian et al.   | 2013 | 64 | Cohort       | Iran   | 3.22 ± 3.49, 3.3 ± 4.27 | CHD  | Healthy subjects                                     | Without | Serum  | High |
| Xin et al.          | 2009 | 80 | Case-control | China  | 63.9 ± 2.1              | CHF  | Healthy                                              | Without | Plasma | High |

|                     |      |     |                 |        |                           |     |                          |         |        |      |
|---------------------|------|-----|-----------------|--------|---------------------------|-----|--------------------------|---------|--------|------|
|                     |      |     |                 |        |                           |     | subjects                 |         | a      |      |
| Yilmaz et al.       | 2007 | 93  | Case-control    | Turkey | 2.59 ± 1.258, 2.41 ± 1.36 | CHD | Healthy children         | Without | Serum  | High |
| Zabarovskaja et al. | 2014 | 24  | Cross-sectional | Sweden | 24 ± 3.7, 57 ± 10.37      | HF  | Healthy subjects         | With    | Plasma | High |
| Zhang#1 et al.      | 2011 | 216 | Case-control    | China  | 74.6 ± 9.5, 76.2 ± 9.6    | CAD | Healthy subjects         | Without | plasma | High |
| Zhang#2a et al.     | 2012 | 84  | Case-control    | China  | NR                        | ACS | Control without diabetes | With    | Plasma | High |
| Zhang#2b et al.     | 2012 | 95  | Case-control    | China  | NR                        | SAP | Control without diabetes | With    | Plasma | High |

**Abbreviations:** CAD: Coronary artery disease; CVD: Cardiovascular disease; CHD: Congenital heart disease; CHF: Congestive heart failure; CAE: Coronary artery ectasia; HF: Heart failure; AF: Atrial fibrillation; MI: Myocardial infarction; DM: Diabetes mellitus; PSVT: Paroxysmal supraventricular tachycardia; AMI: Acute myocardial infarction; IHD: Ischemic heart disease; HD: Hemodialysis; SAP: Stable angina pectoris; UAP: Unstable angina pectoris; IDC: Idiopathic dilated cardiomyopathy; ADHF: Acute decompensated heart failure; HHD: Hypertensive heart disease; BAV: Bicuspid aortic valve; ERAF: Early recurrence of atrial fibrillation; ACS: Acute coronary syndrome; STEMI: ST-elevation myocardial infarction; Non-STEMI: Non-ST-elevation myocardial infarction; NR: Not recorded; MetS: Metabolic syndrome

| <b>Table 2.</b> Subgroup analysis results |                             |                 |                    |             |               |                          |
|-------------------------------------------|-----------------------------|-----------------|--------------------|-------------|---------------|--------------------------|
| <b>Outcomes</b>                           | <b>Subgroups</b>            |                 | <b>No. studies</b> | <b>SMD</b>  | <b>95% CI</b> | <b>I<sup>2</sup> (%)</b> |
| <b>Ghrelin</b>                            | Total                       |                 | 20                 | -0.61       | -1.38, 0.16   | 96.9                     |
|                                           | Study design                | Case-control    | 16                 | -0.92       | -1.90, 0.07   | 97.4                     |
|                                           |                             | Cohort          | 2                  | -0.39       | -1.28, 0.49   | 87.6                     |
|                                           |                             | Cross-sectional | 2                  | 0.71        | -0.02, 1.43   | 0.0                      |
|                                           | Diabetes/MetS comorbidities | With            | 10                 | -2.60       | -4.17, -1.02  | 96.8                     |
|                                           |                             | Without         | 10                 | 0.78        | -0.02, 1.59   | 96.3                     |
|                                           | Body fluid                  | Plasma          | 8                  | -0.54       | -1.40, 0.31   | 95.2                     |
|                                           |                             | Serum           | 12                 | -0.94       | -2.23, 0.35   | 97.4                     |
|                                           | Heart diseases              | CAD             | 9                  | -3.14       | -4.62, -1.66  | 97.3                     |
|                                           |                             | Other diseases  | 11                 | 1.02        | 0.27, 1.77    | 94.7                     |
|                                           | Continent                   | Africa          | 3                  | -5.75       | -10.80, -0.69 | 98.9                     |
|                                           |                             | Europe          | 4                  | 1.53        | 0.25, 2.81    | 93.5                     |
|                                           |                             | America         | 1                  | 0.86        | -0.12, 1.84   | -                        |
|                                           |                             | Asia            | 12                 | -0.99       | -1.68, -0.30  | 94.3                     |
| <b>Ghrelin/TC ratio</b>                   | Total                       |                 | 11                 | -1.02       | -1.74, -0.29  | 94.5                     |
|                                           | Study design                | Case-control    | 10                 | -1.17       | -2.05, -0.28  | 94.9                     |
|                                           |                             | Cohort          | 1                  | -0.07       | -0.38, 0.24   | -                        |
|                                           | Diabetes/MetS comorbidities | With            | 5                  | -2.33       | -5.11, 0.45   | 96.2                     |
|                                           |                             | Without         | 6                  | -0.20       | -0.57, 0.17   | 94.5                     |
|                                           | Body fluid                  | Plasma          | 4                  | -0.02       | -0.20, 0.16   | 0.0                      |
|                                           |                             | Serum           | 7                  | -1.79       | -3.28, -0.30  | 95.7                     |
|                                           | Heart diseases              | CAD             | 7                  | -1.79       | -3.19, -0.40  | 96.4                     |
|                                           |                             | Other diseases  | 4                  | -0.02       | -0.24, 0.21   | 0.0                      |
|                                           | Continent                   | Africa          | 1                  | -9.27       | -10.79, -7.75 | -                        |
|                                           |                             | Europe          | 1                  | 0.09        | -0.42, 0.59   | -                        |
| Asia                                      |                             | 9               | -0.44              | -0.89, 0.01 | 82.4          |                          |

|                            |                             |                |       |             |              |      |
|----------------------------|-----------------------------|----------------|-------|-------------|--------------|------|
| <b>Ghrelin/HDL-c ratio</b> | Total                       |                | 11    | -0.43       | -0.96, 0.10  | 90.7 |
|                            | Study design                | Case-control   | 10    | -0.49       | -1.12, 0.14  | 91.5 |
|                            |                             | Cohort         | 1     | -1.01       | -0.32, 0.30  | -    |
|                            | Diabetes/MetS comorbidities | With           | 6     | -0.87       | -2.32, 0.58  | 94.9 |
|                            |                             | Without        | 5     | -0.00       | -0.17, 0.17  | 0.0  |
|                            | Body fluid                  | Plasma         | 3     | -0.00       | -0.19, 0.19  | 0.0  |
|                            |                             | Serum          | 8     | -0.64       | -1.56, 0.28  | 93.2 |
|                            | Heart diseases              | CAD            | 7     | -0.74       | -1.76, 0.27  | 94.2 |
|                            |                             | Other diseases | 4     | 0.00        | -0.21, 0.21  | 0.0  |
|                            | Continent                   | Africa         | 1     | -4.81       | -5.71, -3.91 | -    |
| Europe                     |                             | 2              | 0.02  | -0.32, 0.35 | 0.0          |      |
| Asia                       |                             | 8              | -0.02 | -0.18, 0.15 | 0.0          |      |
| <b>Ghrelin/LDL-c ratio</b> | Total                       |                | 11    | -0.09       | -0.23, 0.05  | 0.0  |
|                            | Study design                | Case-control   | 10    | -0.11       | -0.27, 0.05  | 0.0  |
|                            |                             | Cohort         | 1     | -0.03       | -0.34, 0.28  | -    |
|                            | Diabetes/MetS comorbidities | With           | 6     | -0.17       | -0.44, 0.09  | 0.0  |
|                            |                             | Without        | 5     | -0.06       | -0.23, 0.11  | 0.0  |
|                            | Body fluid                  | Plasma         | 3     | -0.01       | -0.20, 0.18  | 0.0  |
|                            |                             | Serum          | 8     | -0.19       | -0.40, 0.02  | 0.0  |
|                            | Heart diseases              | CAD            | 7     | -0.17       | -0.37, 0.03  | 4.7  |
|                            |                             | Other diseases | 4     | -0.01       | -0.22, 0.20  | 0.0  |
|                            | Continent                   | Africa         | 1     | -0.00       | -0.51, 0.50  | -    |
| Europe                     |                             | 2              | 0.00  | -0.33, 0.33 | 0.0          |      |
| Asia                       |                             | 8              | -0.12 | -0.29, 0.04 | 0.0          |      |
| <b>Ghrelin/TG ratio</b>    | Total                       |                | 12    | -0.55       | -1.16, 0.07  | 93.1 |
|                            | Study design                | Case-control   | 11    | -0.71       | -1.45, 0.02  | 93.7 |
|                            |                             | Cohort         | 1     | -0.01       | -0.32, 0.30  | -    |
|                            | Diabetes/MetS comorbidities | With           | 6     | -2.91       | -4.99, -0.83 | 96.8 |
|                            |                             | Without        | 6     | -0.03       | -0.19, 0.13  | 93.1 |
| Body fluid                 | Plasma                      | 4              | -0.00 | -0.18, 0.18 | 0.0          |      |

|  |                |                |   |        |                |      |
|--|----------------|----------------|---|--------|----------------|------|
|  |                | Serum          | 8 | -1.55  | -2.78, -0.32   | 95.6 |
|  | Heart diseases | CAD            | 7 | -1.86  | -3.21, -0.50   | 96.2 |
|  |                | Other diseases | 5 | 0.00   | -0.19, 0.20    | 0.0  |
|  | Continent      | Africa         | 1 | -26.07 | -30.13, -22.00 | -    |
|  |                | Europe         | 2 | 0.02   | -0.31, 0.36    | 0.0  |
|  |                | Asia           | 9 | -0.07  | -0.23, 0.09    | 0.0  |

**Met-regression results**

**Suppl Fig. Fb (Ghrelin)**

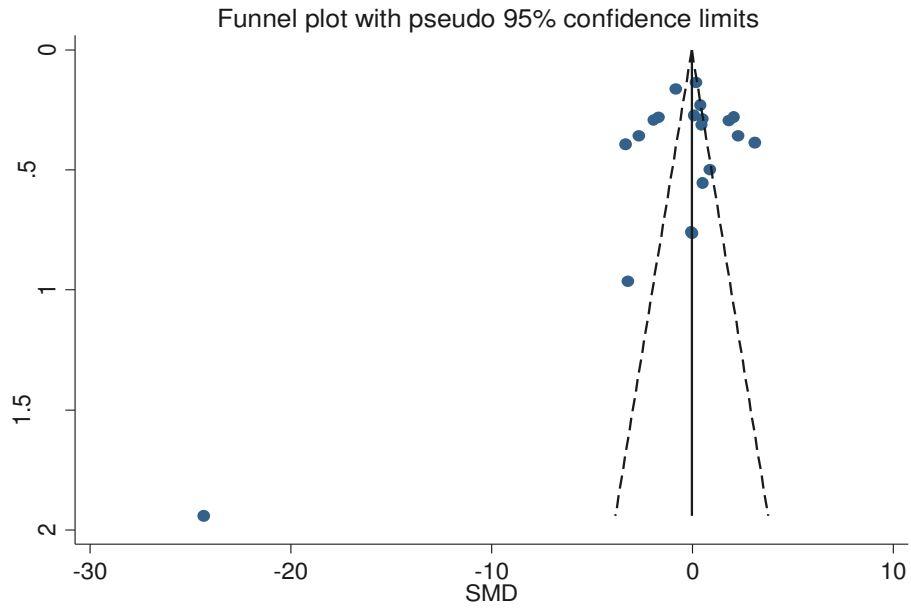

Supplement: jim-2021-002100supp001_data_supplement.pdf [file jim-2021-002100supp001_data_supplement.pdf]
